# Supplementary material
Source: Springer Nature journal article supplement (https://www.springermedizin.de/resource/supplementary/12950_2012_282_MOESM3_ESM.pdf/9557474)

top panel (3 and 6 hours)

Relative concentration of IL8 and NFKBIA mRNA (Y-axis) measured by QRT-PCR in *Salmonella* (+Salm) and mock (-Salm) treated IPEC-J2 cells after 3 and 6 hours, in the absence (0  $\mu$ M bars) and presence of different concentrations of chemical ( $\mu$ M bars). For each concentration of chemical two independent observations are presented.

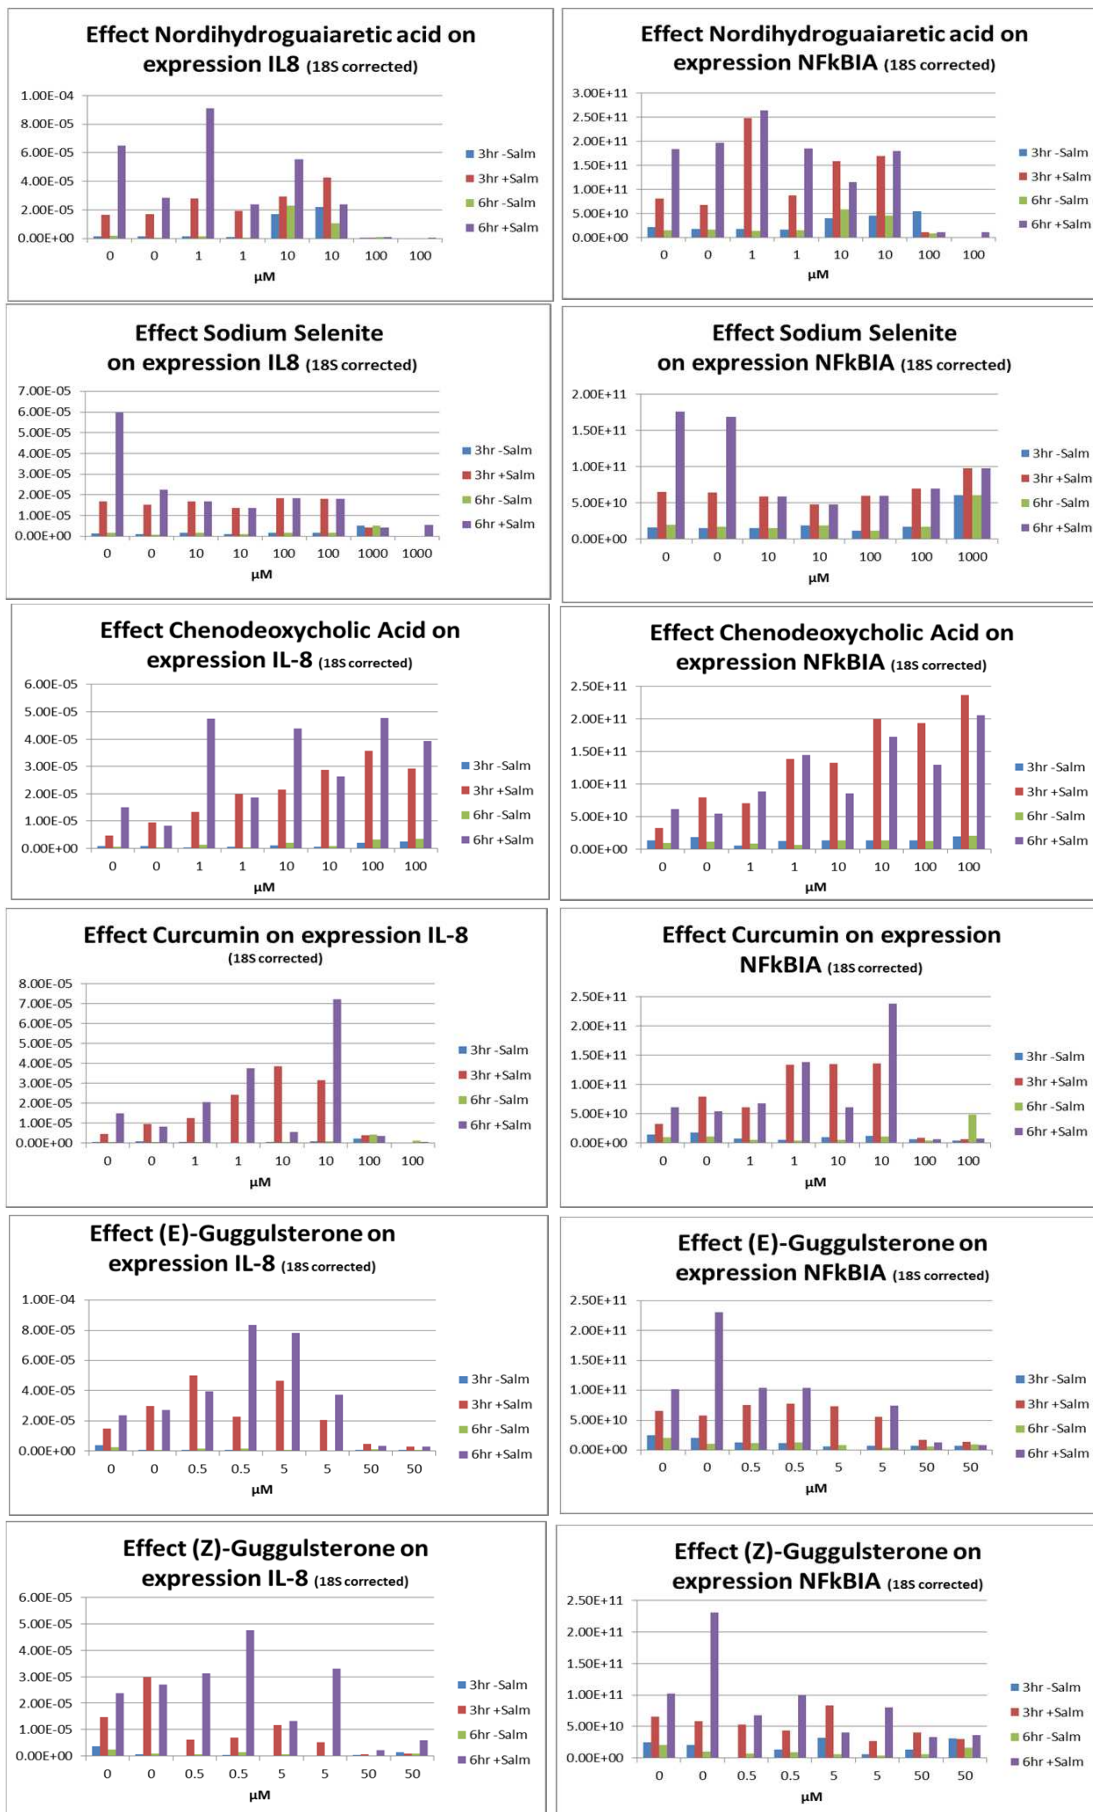

**bottom panel (4 and 20 hours)**

Relative concentration of IL8 and NFKBIA mRNA measured by QRT-PCR in Salmonella and mock treated IPEC-J2 cells after 4 and 20 hours, in the absence (0  $\mu\text{M}$  bars) and in the presence of different concentrations of chemical ( $\mu\text{M}$  bars). Bars represent the mean of 2 independent observations. Error bars represent the variation between these 2 independent observations.

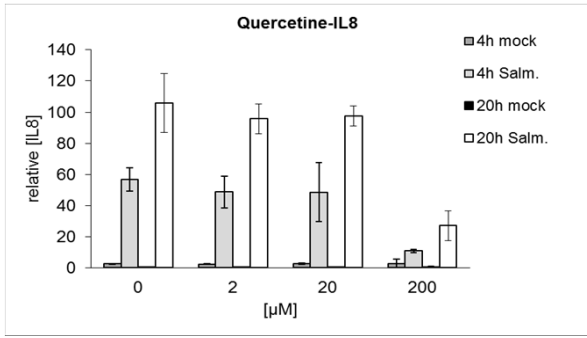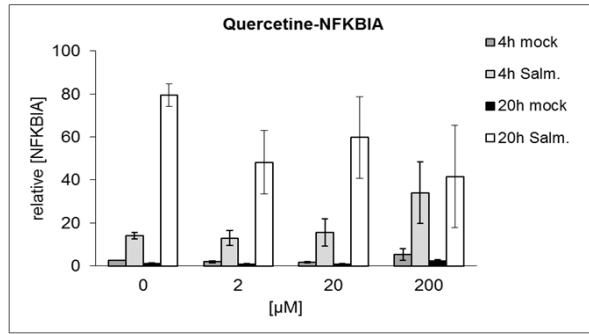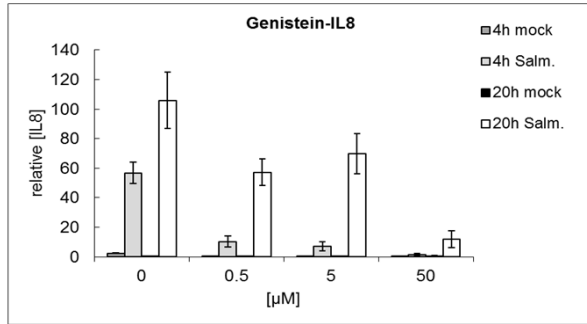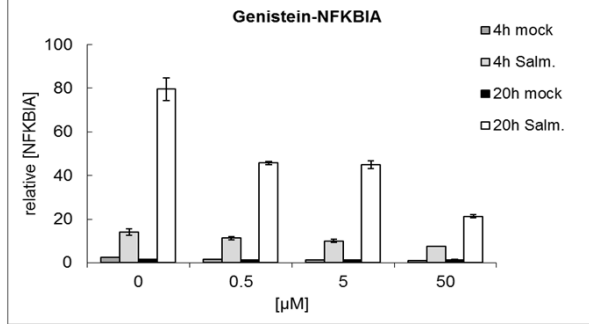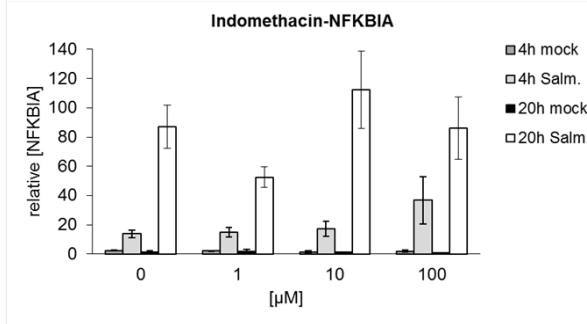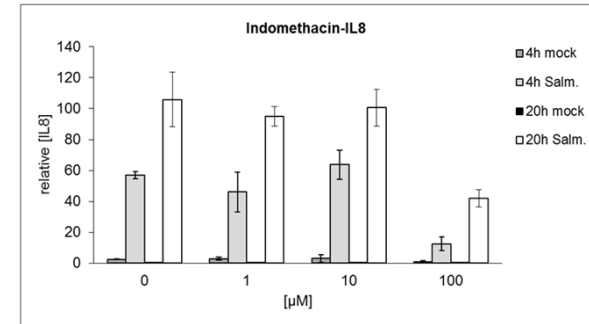

Supplement: MOESM3 [file 9557474]
